# Supplementary material
Source: Springer Nature journal article supplement (https://www.springermedizin.de/resource/supplementary/12931_2010_1029_MOESM1_ESM.pdf/9425542)

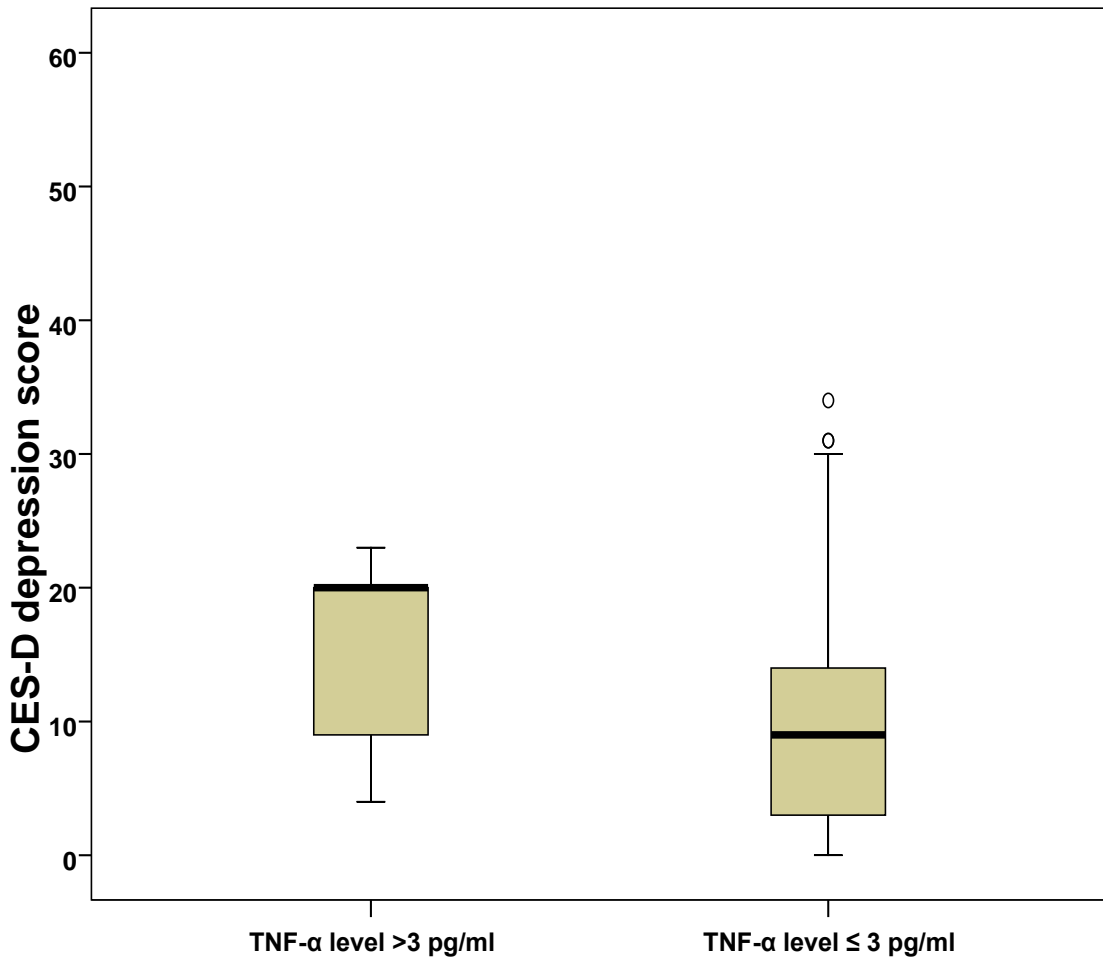

**Patients categories according to plasma TNF-α level**

Supplement: MOESM1 [file 9425542]
